# Supplementary material for: Extracellular vesicle in vivo biodistribution is determined by cell source, route of administration and targeting
Source: PubMed Central journal article supplement — J Extracell Vesicles. 2015 Apr 20;4:10.3402/jev.v4.26316. doi: 10.3402/jev.v4.26316 (PMC4405624; doi:10.3402/jev.v4.26316), 2015-04-20

**Figure 1**

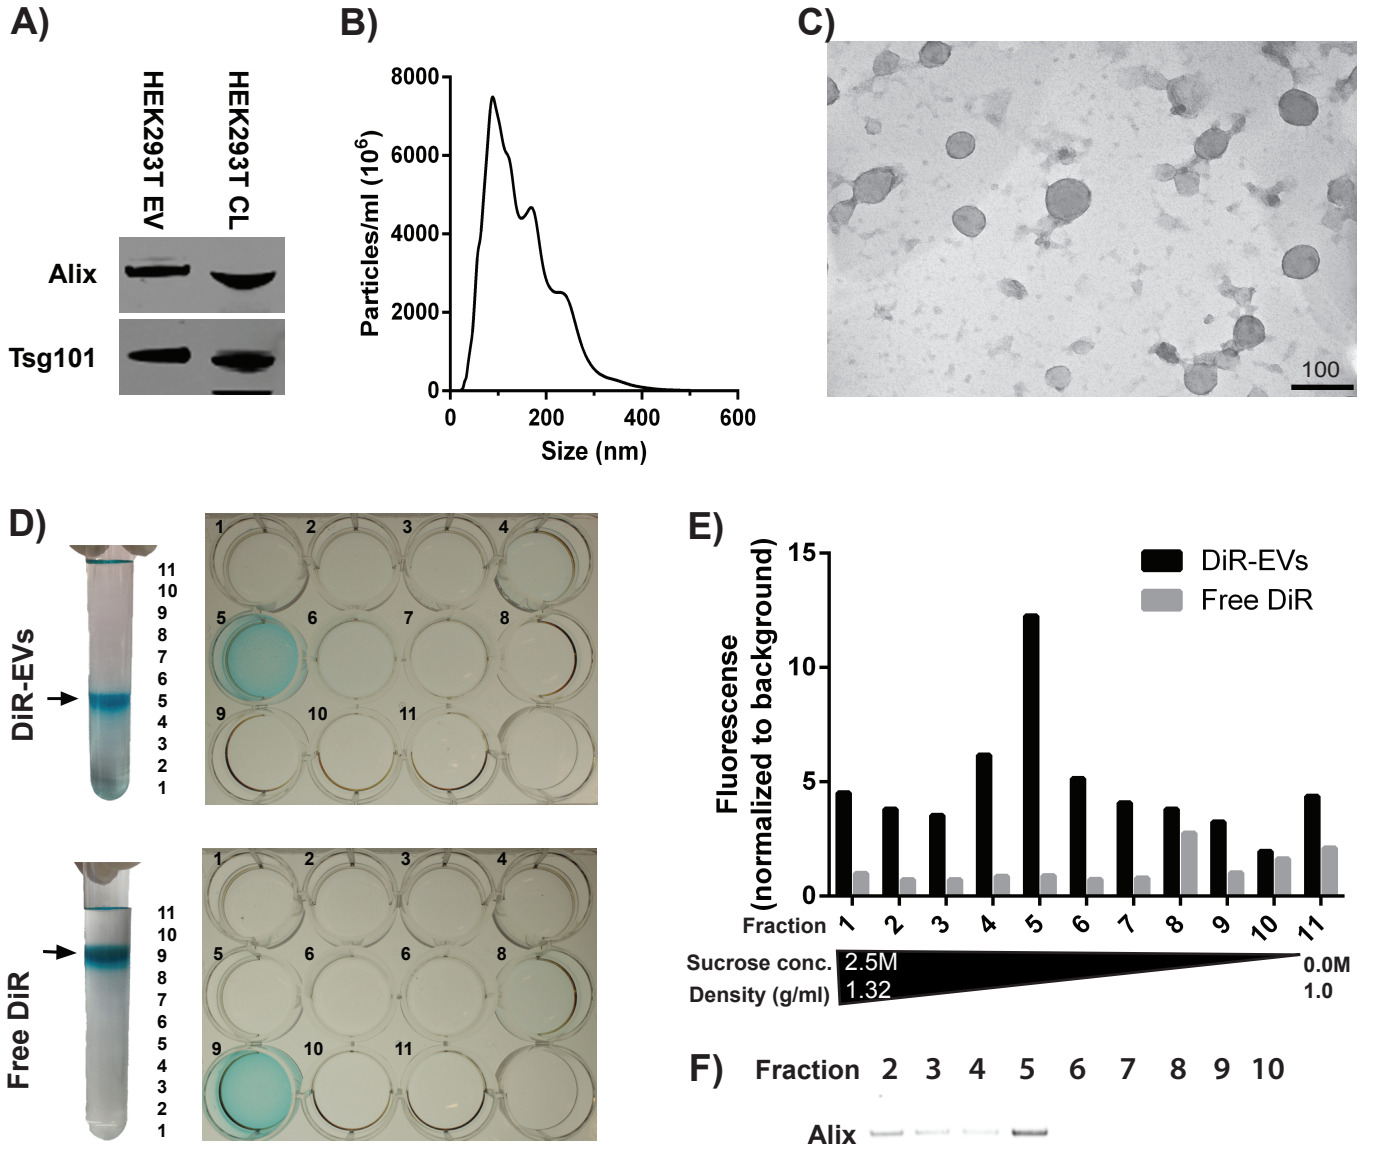

# Figure 2

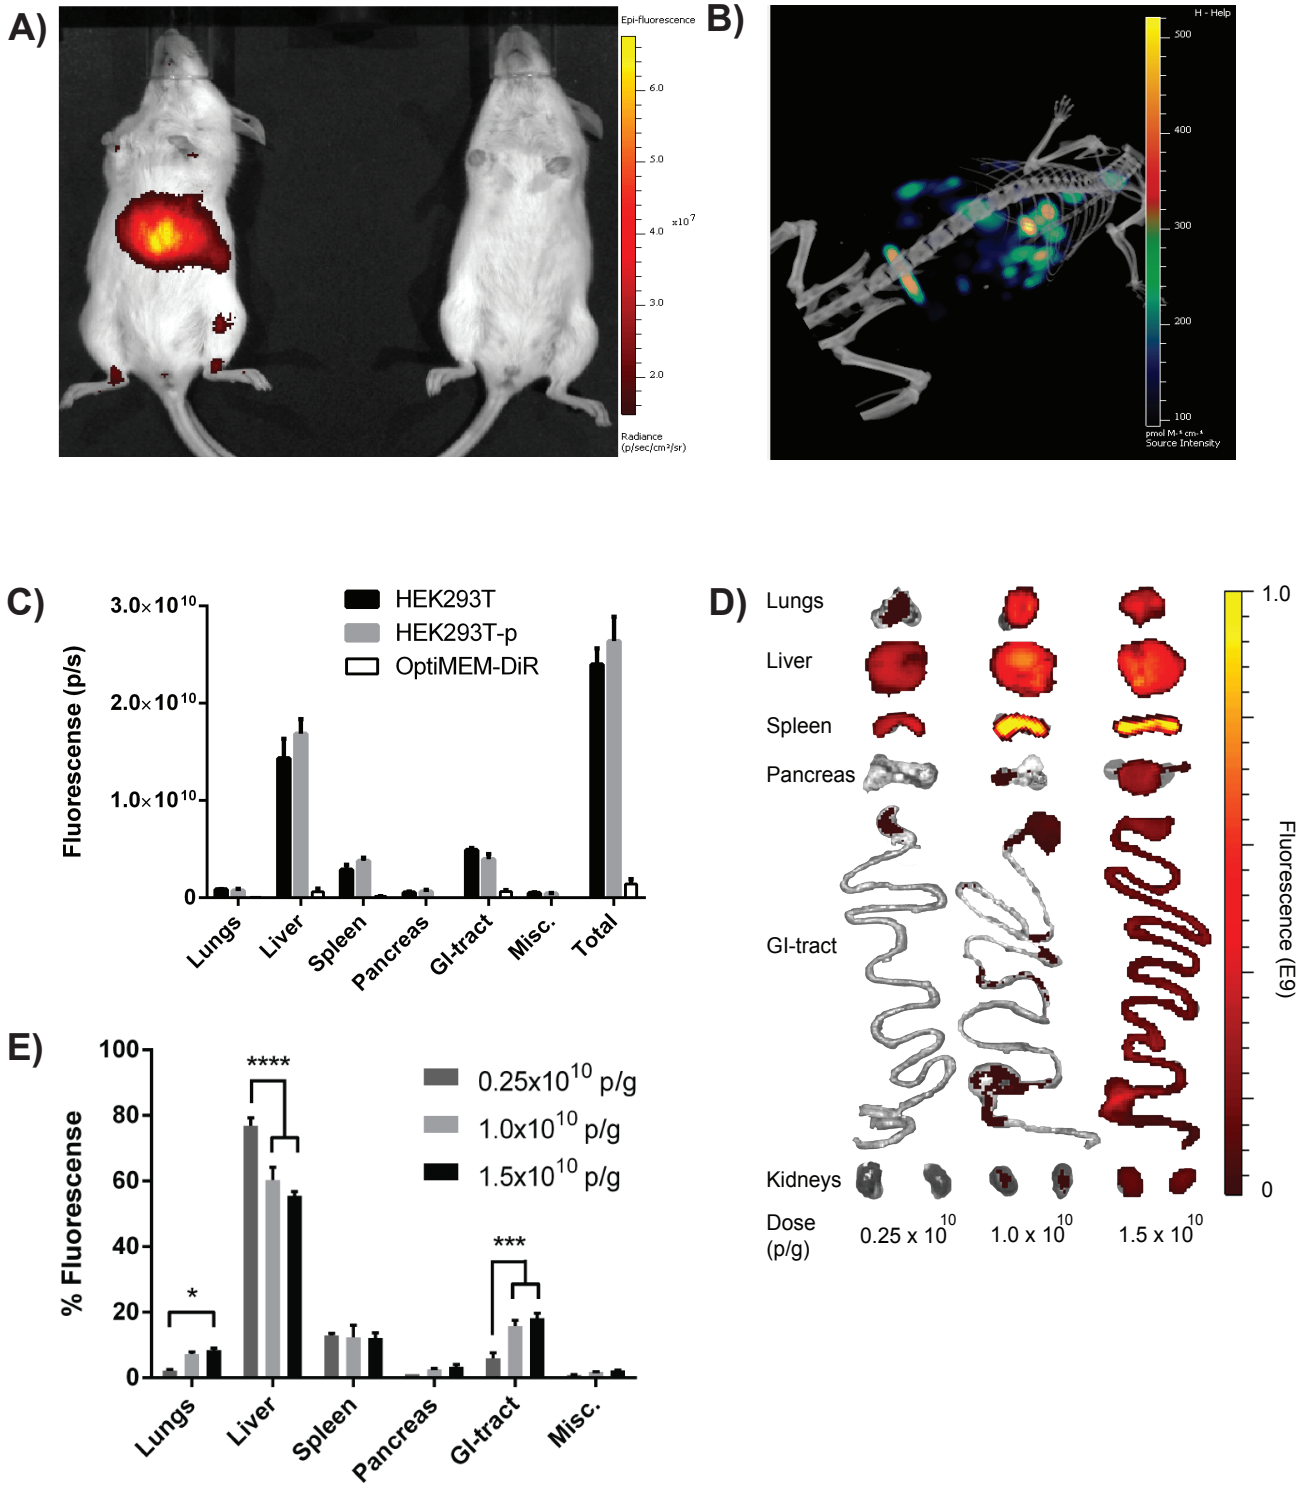

**Figure 3**

**A)**

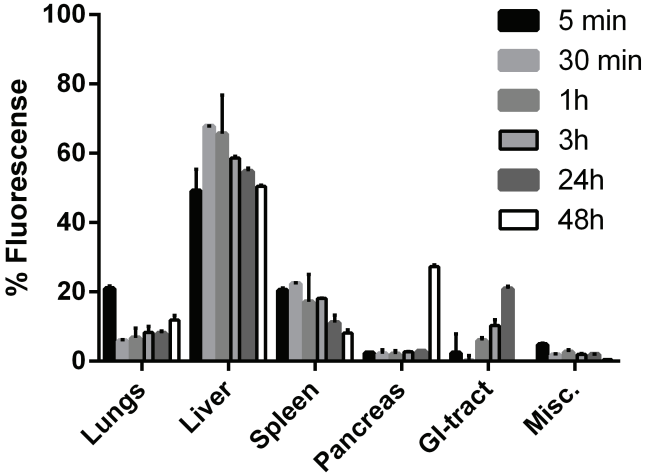

**B)**

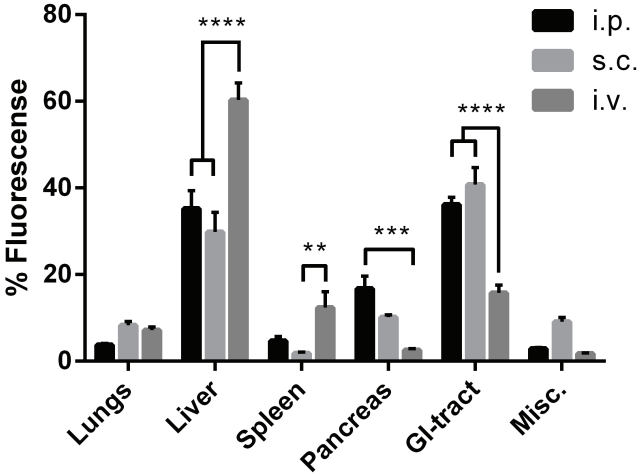

**Figure 4**

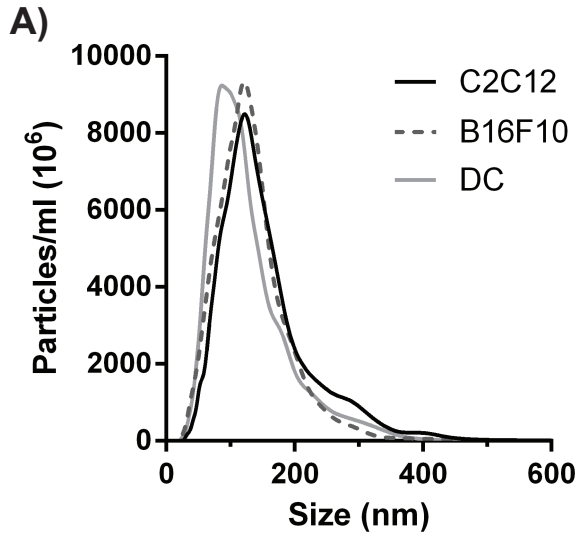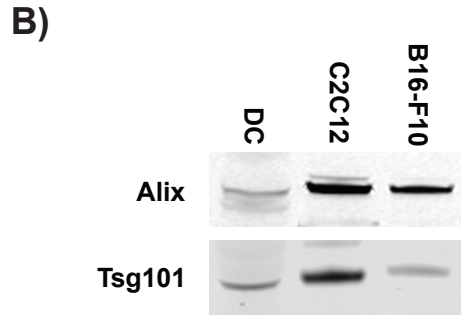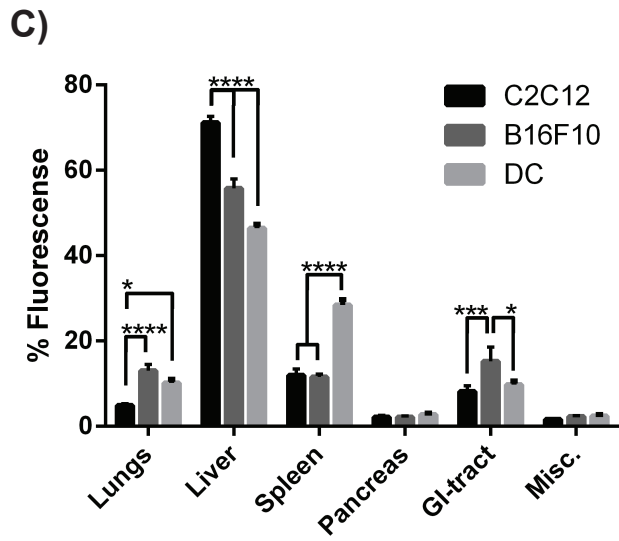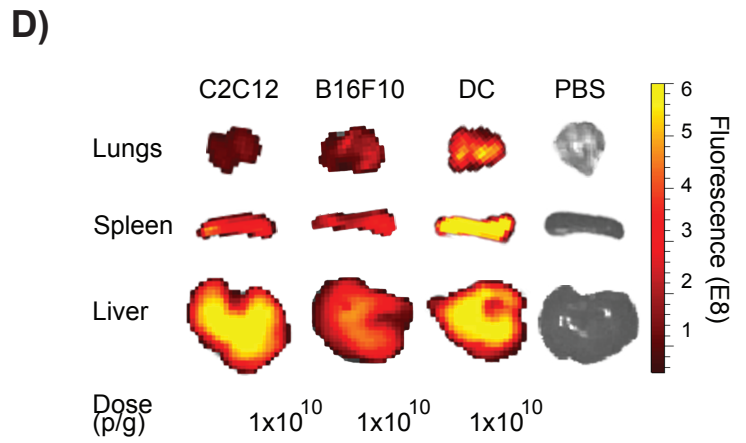

# Figure 5

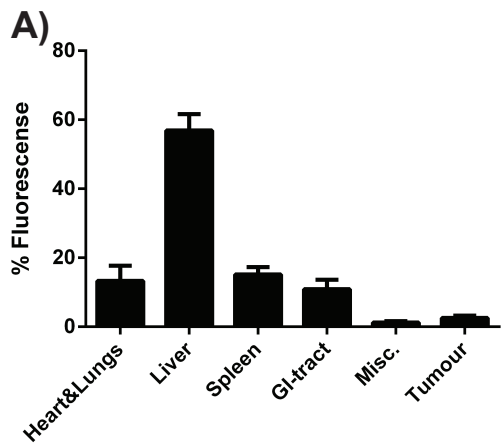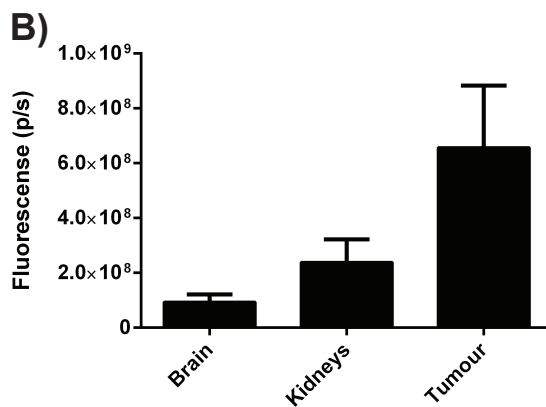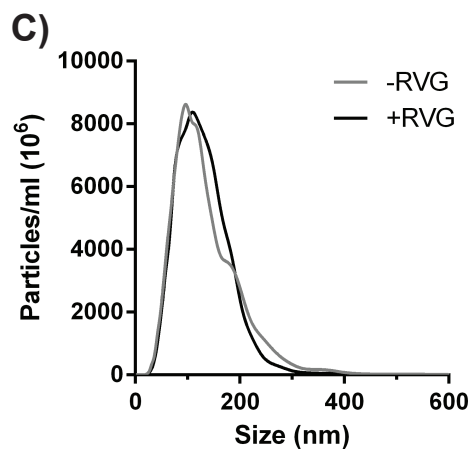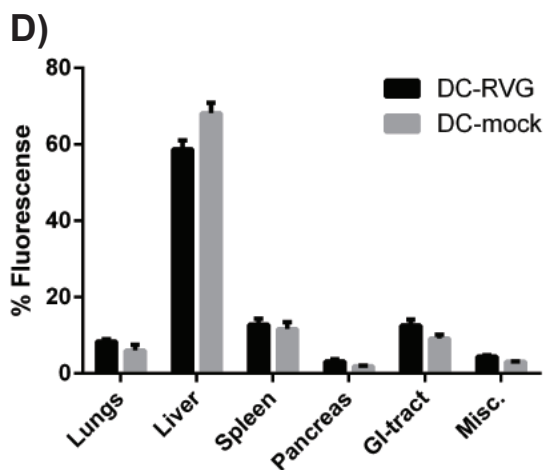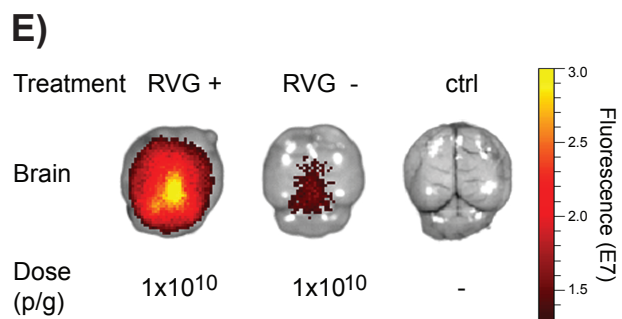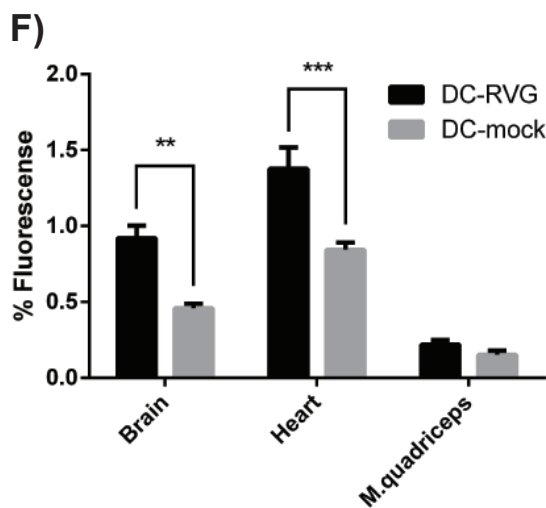

Supplementary Fig. S1

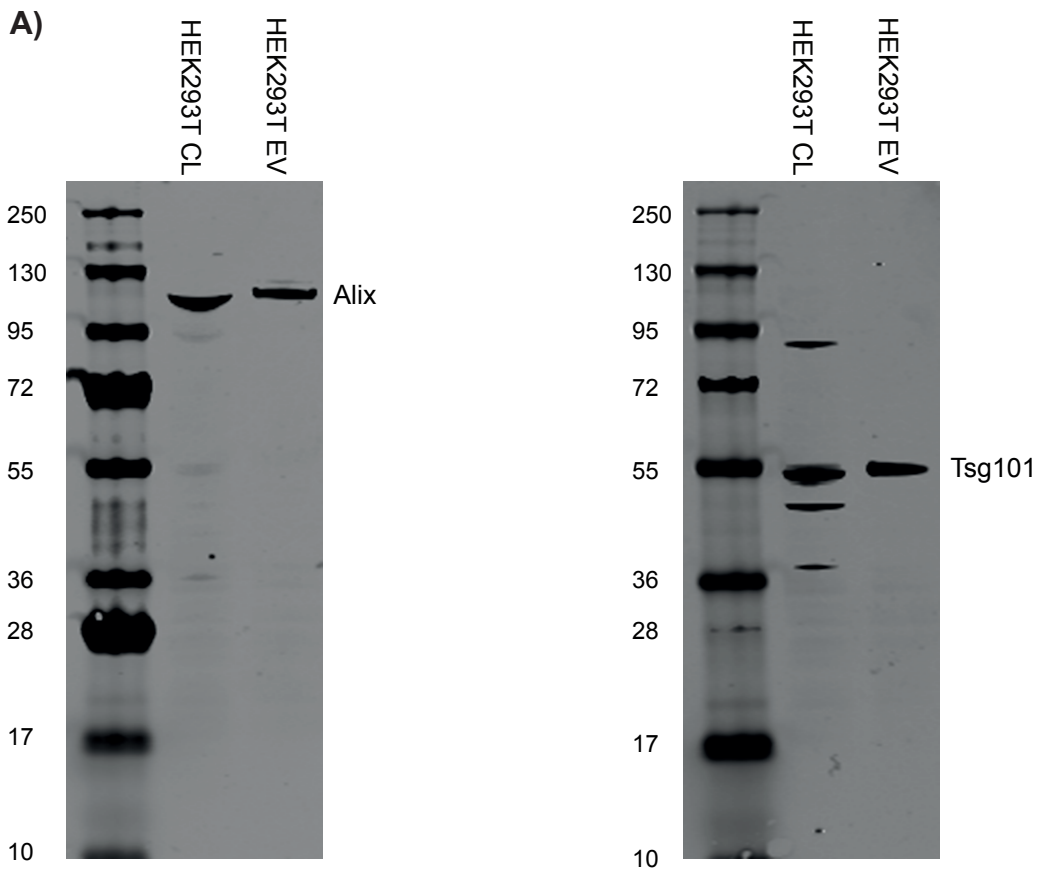

Supplementary Fig. S1

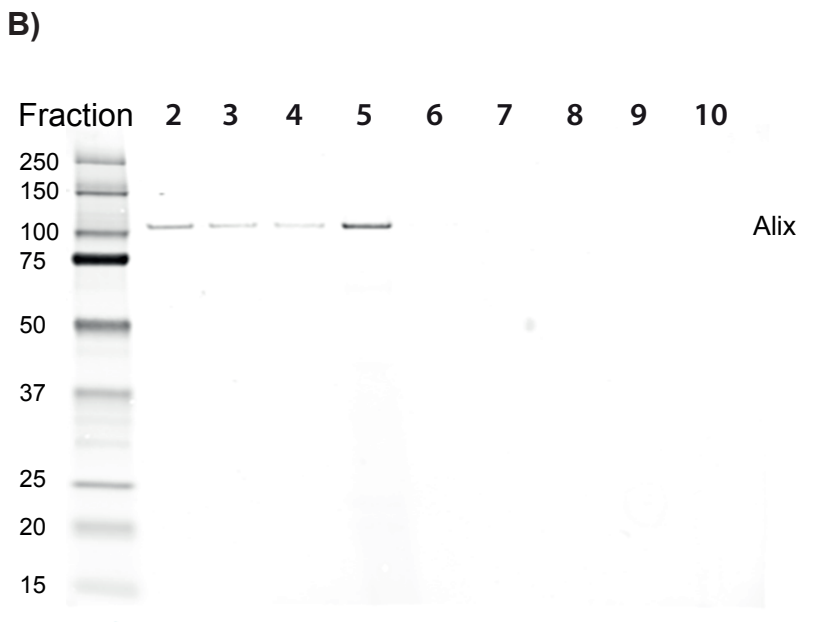

**Supplementary Fig. S2**

**A)**

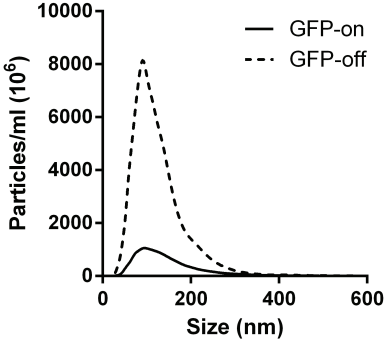

**B)**

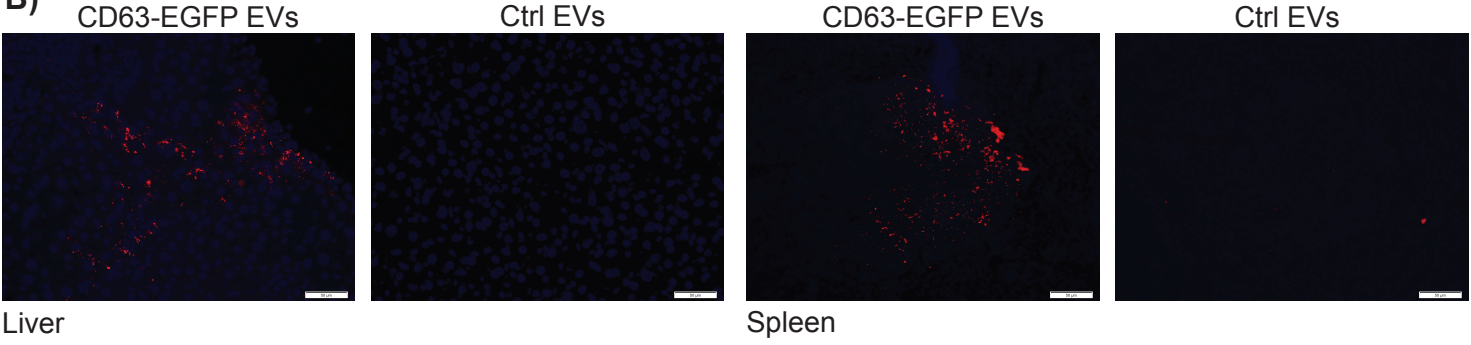

Supplementary Fig. S3

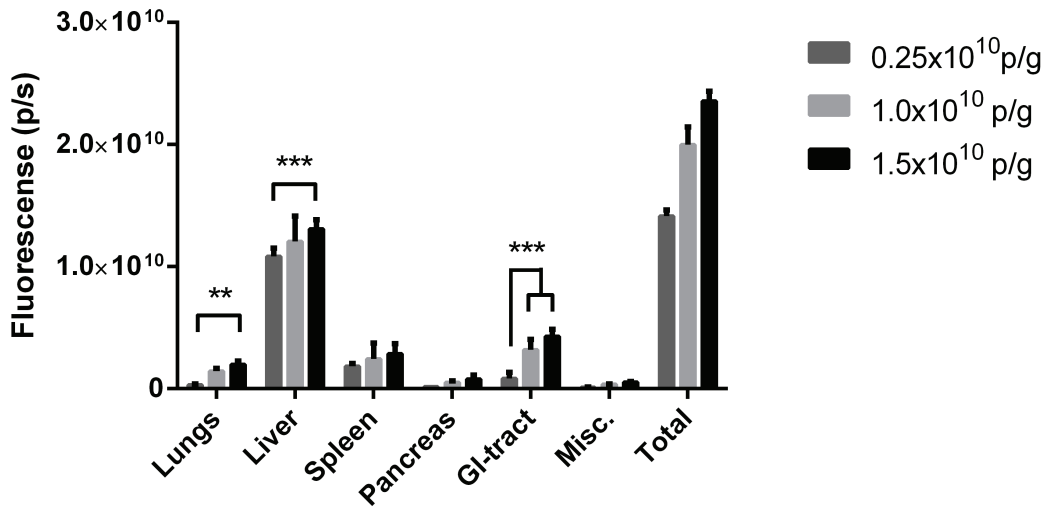

Supplementary Fig. S4

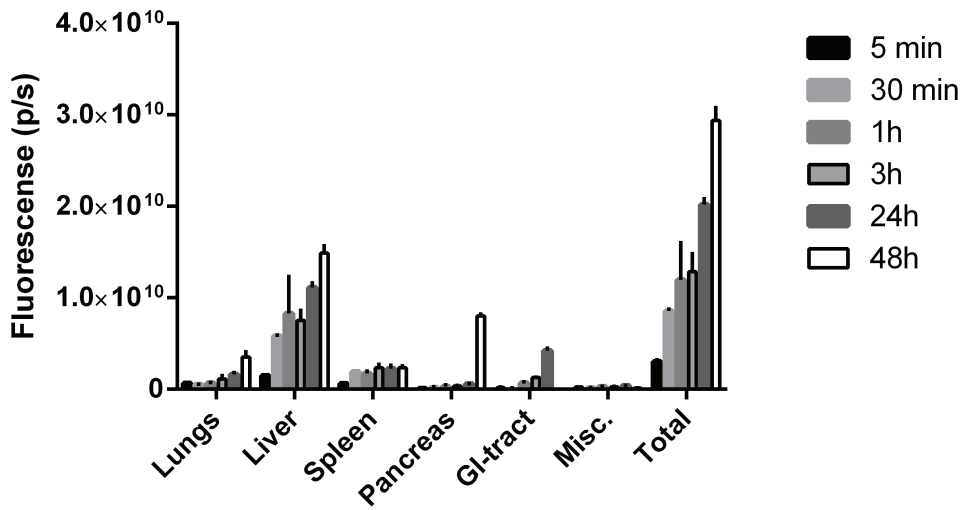



### Supplementary Fig. S5

A)

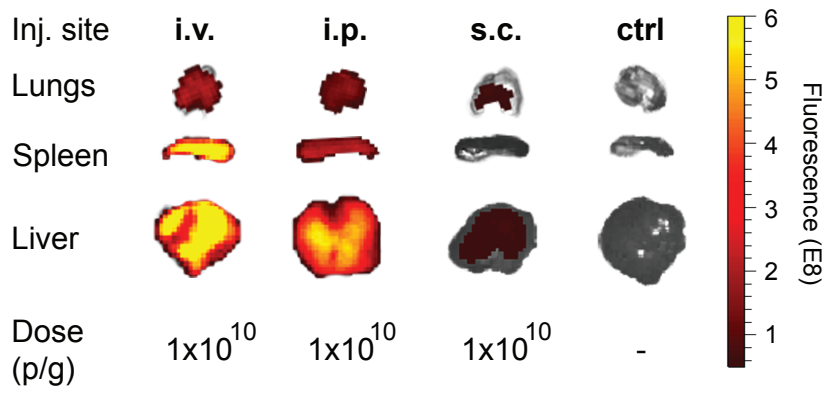

B)

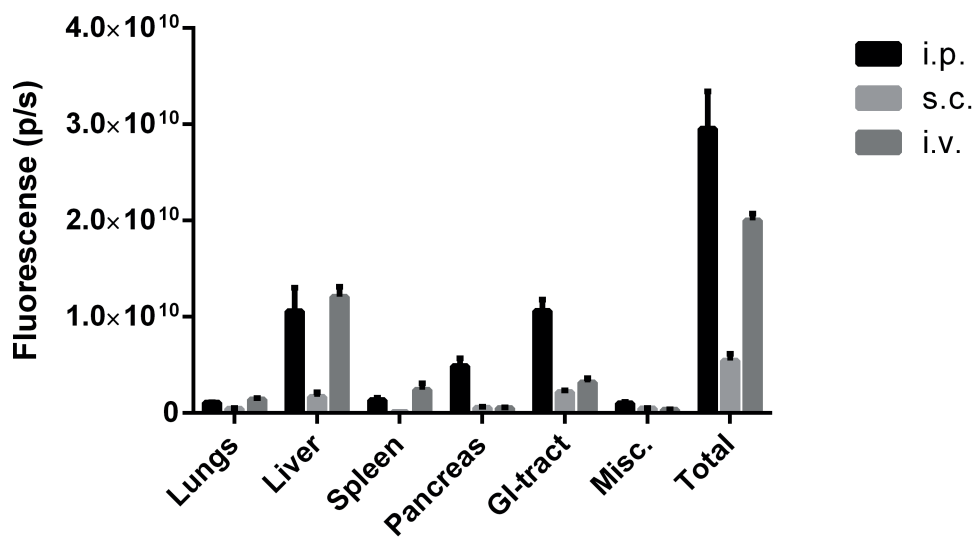

# Supplementary Fig. S6

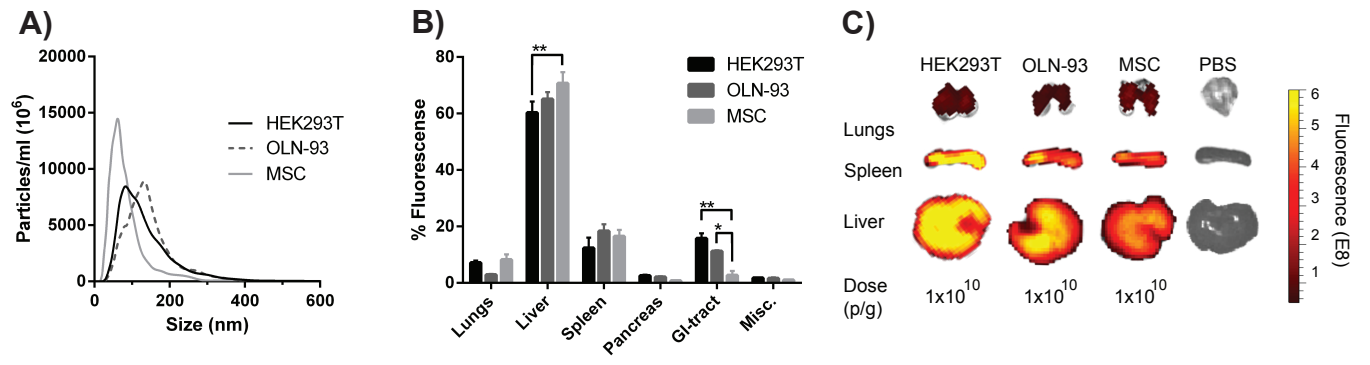

Supplementary Fig. S7

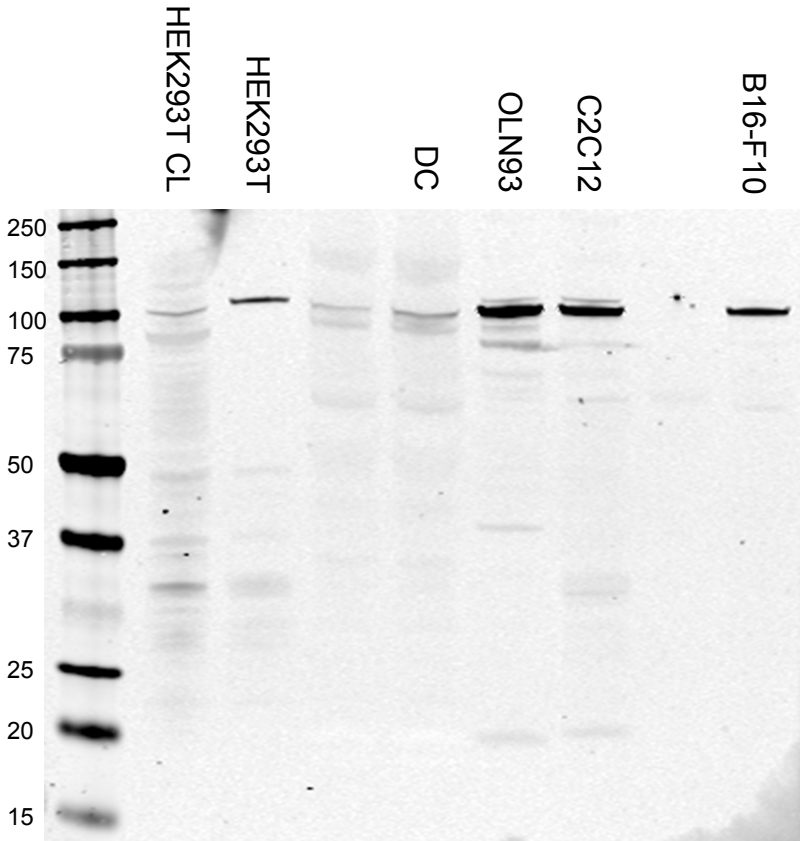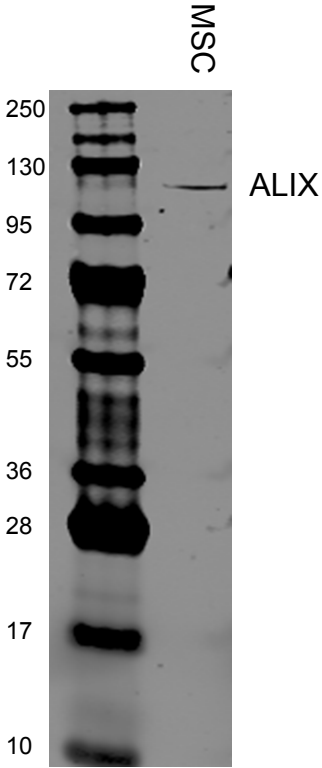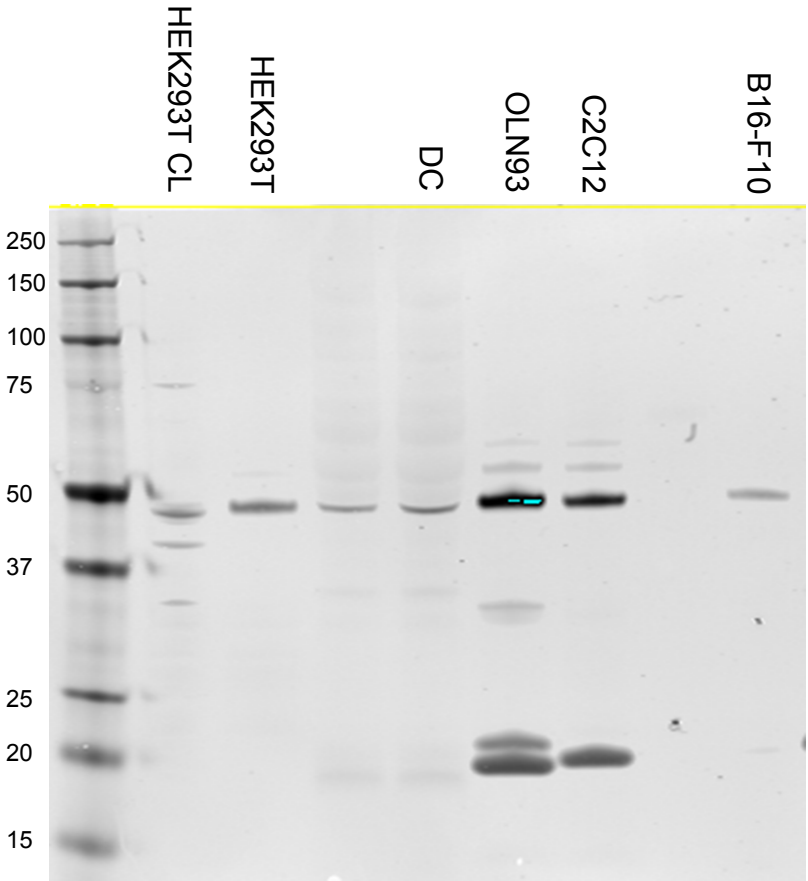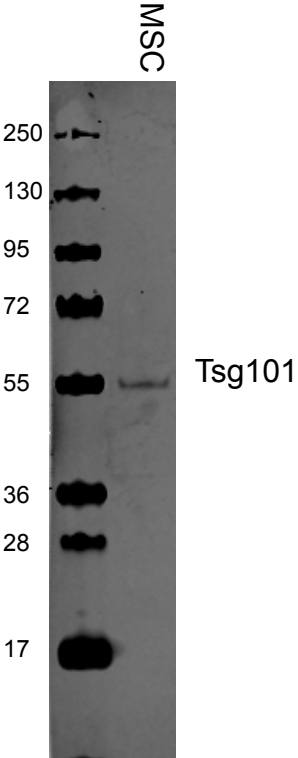

# Supplementary Fig. S8

## A) C2C12

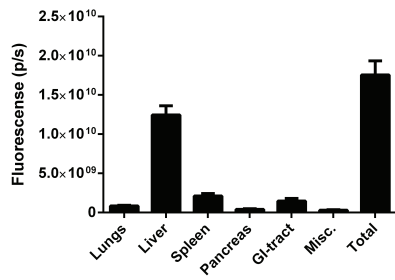

## C) OLN-93

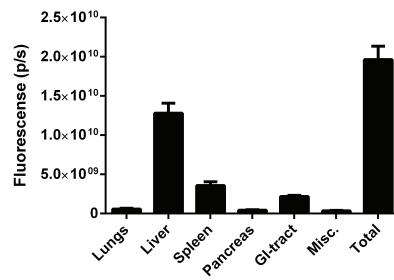

## E) MSC

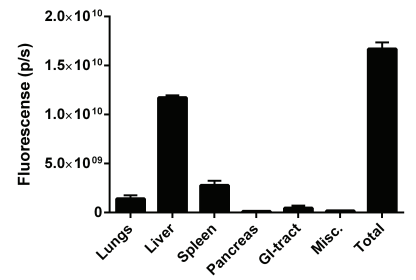

## B) HEK

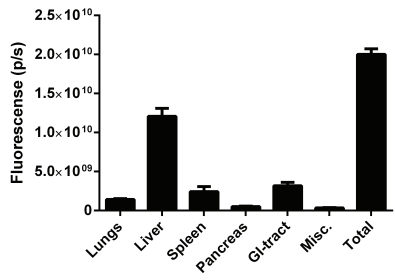

## D) DC

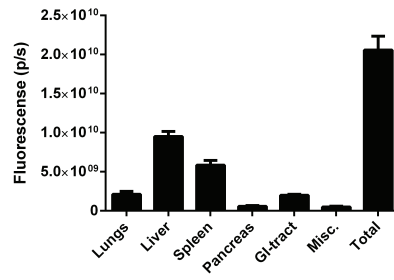

## F) B16F10

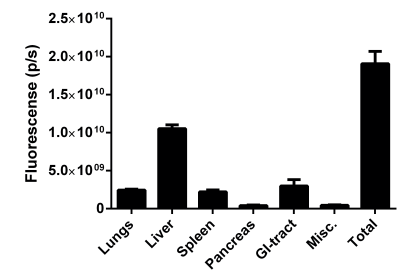

Supplementary Fig. S9

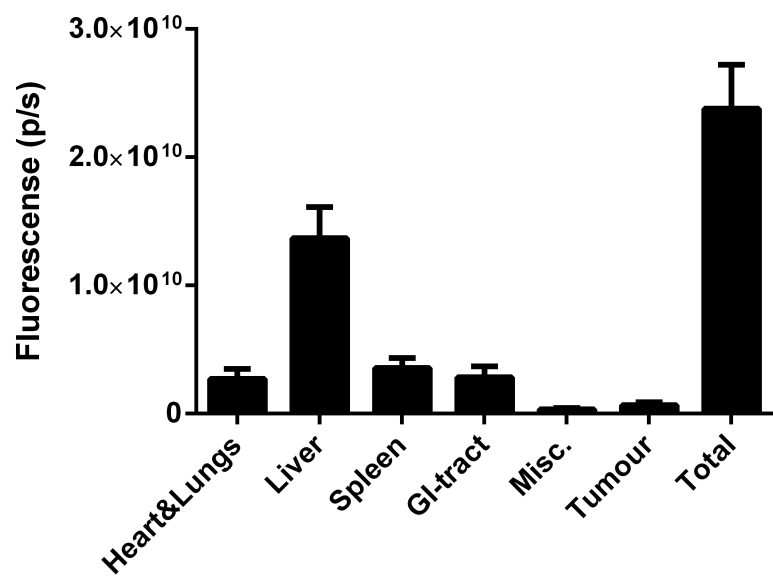

Supplementary Fig. S10

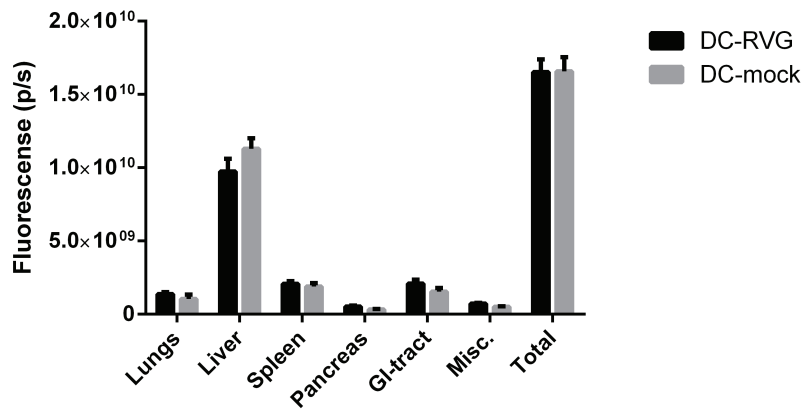

Supplementary Fig. S11

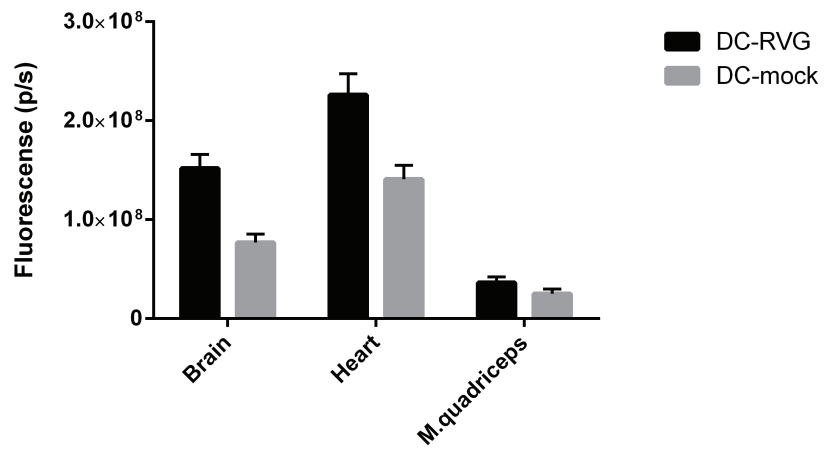

Supplement: JEV-4-26316-s001.pdf [file JEV-4-26316-s001.pdf]
